# Supplementary material for: Integrated lipase production and in situ biodiesel synthesis in a recombinant Pichia pastoris yeast: an efficient dual biocatalytic system composed of cell free enzymes and whole cell catalysts
Source: PubMed Central journal article supplement (PMC4022340; doi:10.1186/1754-6834-7-55), 2014-04-08

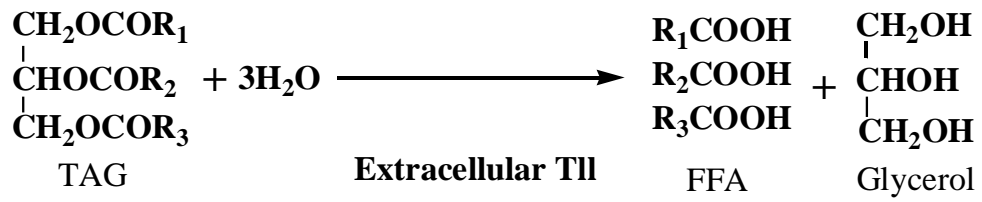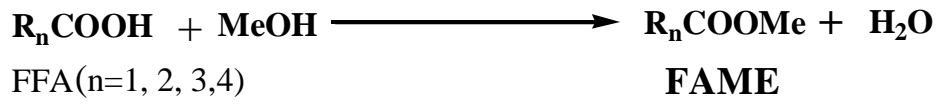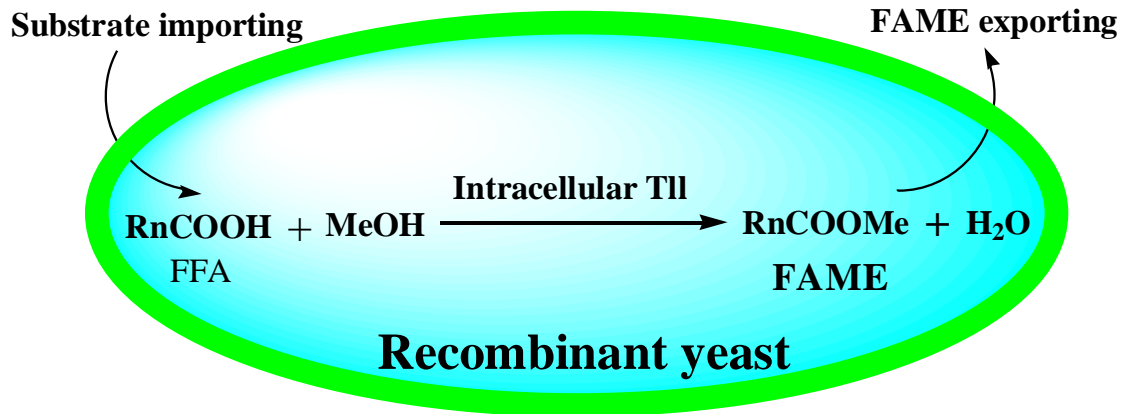

Supplement: 1754-6834-7-55-S1.pdf [file 1754-6834-7-55-S1.pdf]
